# Supplementary material
Source: HighWire-hosted journal article supplement (http://www.annfammed.org/highwire/filestream/8631/field_highwire_adjunct_files/0/LaNoue_Supp_Figs_1-3.pdf)
Supplement: LaNoue_Supp_Figs_1-3.pdf [file LaNoue_Supp_Figs_1-3.pdf]

**Supplemental Figures 1-3 for:**

---

Lanoue M, Mills G, Cunningham A, Sharbaugh A. Concept mapping as a method to engage patients in clinical quality improvement. *Ann Fam Med.* 2016;14(4):370-376.

**Figure 1. Cluster map: improvement categories.**

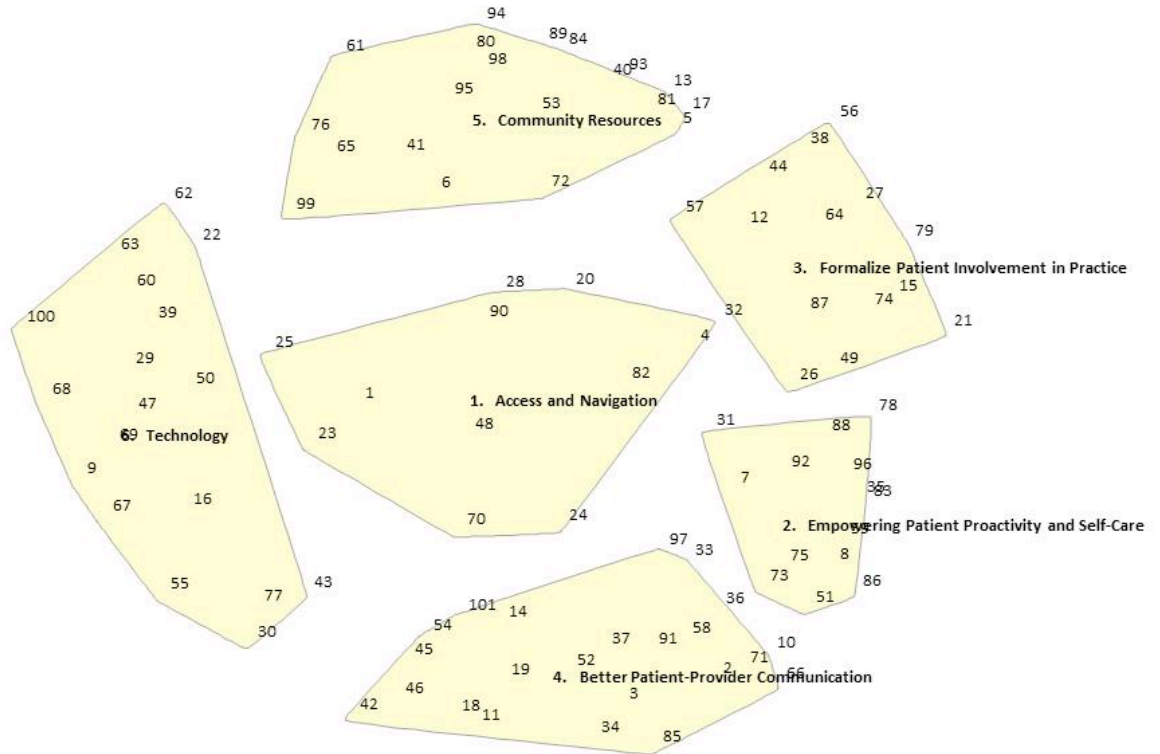

Note: Each numbered point represents 1 of the 101 practice improvement ideas identified by concept mapping study participants. Each labeled polygon contains a domain of conceptually similar practice improvement ideas.

**Figure 2. Impact go-zone diagram.**

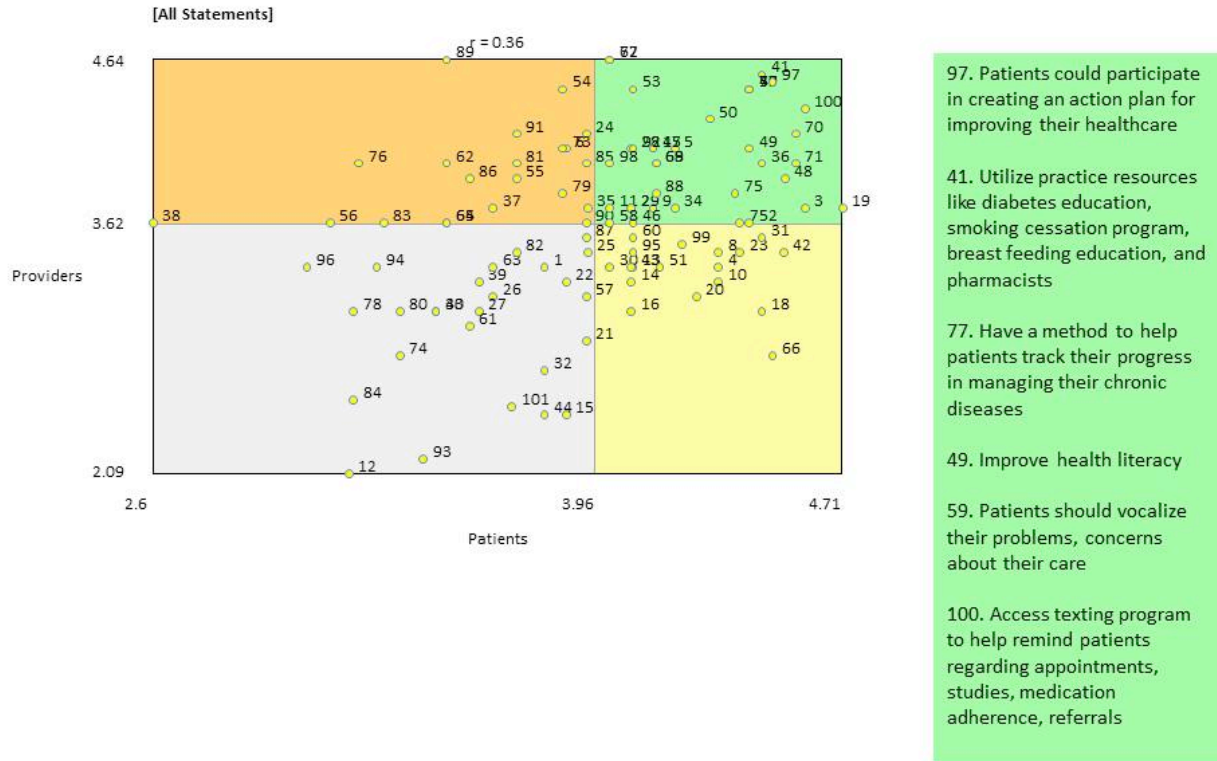

Note: Example of a go-zone diagram: the green quadrant contains statements rated as having high impact by both patients and providers.

**Figure 3. Pattern match: impact ratings of patients and providers.**

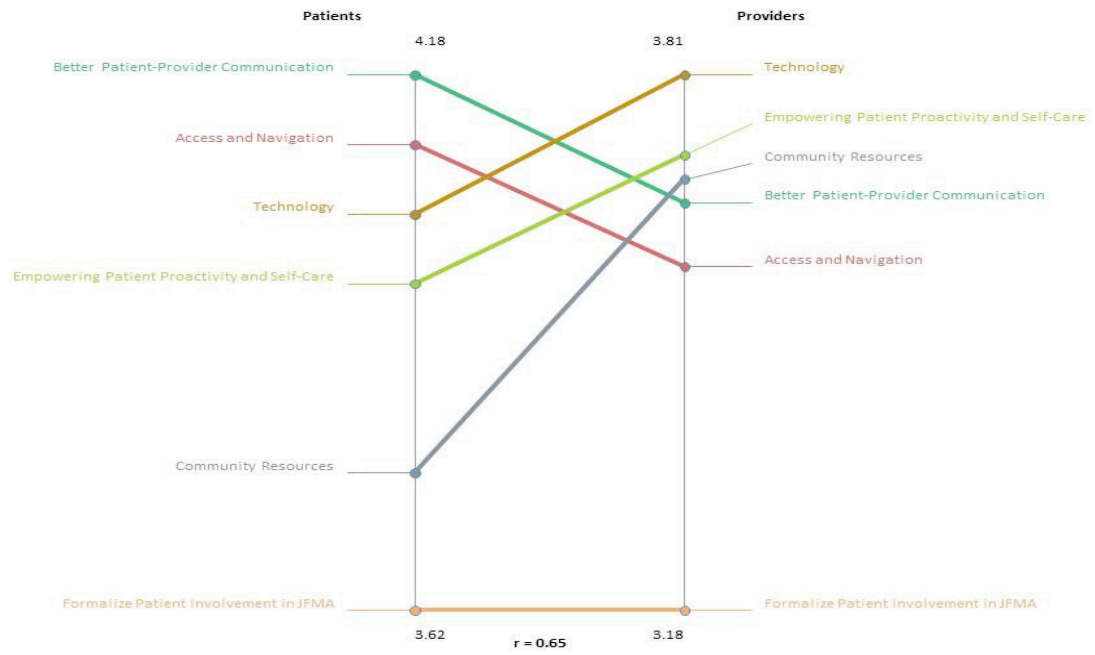

Note: The pattern match between patients and providers for impact ratings.
